# Supplementary material for: Characterizing and Eliminating the Inbreeding Load
Source: MDPI journal article supplement (doi:10.3390/vetsci11010008), 2023-12-22
Supplement: s1 [file s1]

**Supplement Table S1: Inbreeding load related parameters**

| Studies                                                                                    | Concept                                           | Sign             | Definition                                                                                                                              | Formula                                                                                                                     | Software                                                |
|--------------------------------------------------------------------------------------------|---------------------------------------------------|------------------|-----------------------------------------------------------------------------------------------------------------------------------------|-----------------------------------------------------------------------------------------------------------------------------|---------------------------------------------------------|
| Wright [1]<br>Suwanlee et al. [2]<br>Boichard [3]<br>Gutiérrez et al. [4]<br>Coster [5][6] | Inbreedin<br>g<br>coefficient                     | F                | The probability that the two alleles at any locus in an individual are identical by descent                                             | $F_x = \sum \left(\frac{1}{2}\right)^{n+n'+1} (1 + f_a)$                                                                    | PEDIG<br><br>ENDOG<br><br>Package<br>"pedigree"<br>in R |
| Ballou [1][7]<br>Baumung et al. [8]<br>00D,oeakes et al. [2][6]                            | Ancestral<br>inbreeding<br>coefficient            | F <sub>BAL</sub> | The probability that any allele in an individual has been autozygous in previous generations at least once                              | $F_{Bal(x)} = \frac{\left[ F_{Bal(s)} + (1 - F_{Bal(s)}) * F_{W(s)} + F_{Bal(d)} + (1 - F_{Bal(d)}) * F_{W(d)} \right]}{2}$ | GRAIN                                                   |
| Kalinowski et al. [9]<br>Baumung et al. [8]<br>Doekes et al. [6]                           | Ancestral<br>inbreeding<br>coefficient            | F <sub>KAL</sub> | The probability that any allele in an individual is currently autozygous and has been autozygous in previous generations at least once. | Equation was not given                                                                                                      | GRAIN                                                   |
| Kalinowski et al. [9]<br>Baumung et al. [8]<br>Doekes et al. [6]                           | Kalinowsk<br>i "new"<br>inbreeding<br>coefficient | F <sub>NEW</sub> | The probability that any allele in an individual is autozygous for the first time.                                                      | $F_{New(x)} = F_{W(x)} - F_{Kal(x)}$                                                                                        | GRAIN                                                   |

|                                                            |                                                                                     |              |                                                                                                                                 |                                                             |          |
|------------------------------------------------------------|-------------------------------------------------------------------------------------|--------------|---------------------------------------------------------------------------------------------------------------------------------|-------------------------------------------------------------|----------|
| Baumung et al. [8]<br>Doekes et al. [6]                    | Ancestral<br>inbreeding<br>coefficient<br>(Ancestral<br>history<br>coefficient<br>) | $A_{HC}$     | The number that tells how many times during pedigree segregation (gene dropping) a randomly taken allele has been in IBD status | Equation was not given                                      | GRAIN    |
| Slatis [1]<br>Kennedy et al. [10]                          | Likelihood<br>of genetic<br>death                                                   | ll           | The likelihood of genetic death (ie. all founders carry a recessive lethal gene)                                                | Equation was not given                                      | R script |
| Hinrichs et al. [11]                                       | Ancestral<br>inbreedin<br>g<br>coefficient                                          | $F_{OLD}$    | The inbreeding occurring further back in the population history ("Old" inbreeding)                                              | $F_{i,old}(t,u) = \frac{F_i(0,u) - F_i(t,u)}{1 - F_i(t,u)}$ | PEDIG    |
| Hinrichs et al. [11]                                       | New<br>inbreedin<br>g<br>coefficient                                                | $F_{NEW\_H}$ | The inbreeding occurring in recent generations ("New" inbreeding)                                                               | $F_{i,new}(t,u) = F_i(0,u) - F_{i,old}(t,u)$                | PEDIG    |
| López-Cortegano et al. [12]<br>García-Dorado et al. [13]   | Purging<br>coefficient                                                              | d            | The part of deleterious effect that is exposed to genetic purging due to inbreeding                                             | $d = s(1/2-h)$                                              | PURGd    |
| López-Cortegano et al. [12]<br>López-Cortegano et al. [14] | Purged<br>inbreeding<br>coefficient                                                 | g            | The inbreeding coefficient (F) adjusted by the deleterious frequency that is expected by considering purging                    | $\hat{g} = \frac{1 - 2d}{1 + 2d(2N - 1)}$                   | PurgeR   |

|                                         |                                   |           |                                                                                                                                                                             |                                         |                    |
|-----------------------------------------|-----------------------------------|-----------|-----------------------------------------------------------------------------------------------------------------------------------------------------------------------------|-----------------------------------------|--------------------|
| Kardos et al. [15]                      | Genomic inbreeding coefficient    | $F_{ROH}$ | The proportion of the autosomal genome, in which autozygosity is derived from the assumption that very long stretches of homozygosity (ROH) can only result from inbreeding | $F_{ROH} = \sum L_{ROH} / L_{AUTOSOME}$ | PLINK version 1.07 |
| Gulisija and Crow [14]                  | Expressed opportunity for purging | $O_E$     | The expressed opportunity for purging is the potential for reduction in expressed load in the present generation as a consequence of having inbred ancestors                | $O_{Ei} = \sum 2F_{i(j)}F_j$            | PurgeR             |
| Morton et al. [16]<br>Hoeck et al. [17] | The number of lethal equivalents  | $B$       | The number of deleterious genes per gamete that, when combined in a homozygous state, would result in the death of an individual                                            | $S_F = e^{-A-BF}$                       | R script           |

- $F_x$  is the conventional inbreeding coefficient of the individual  $x$ ,  $f_a$  is the inbreeding coefficient of the common ancestors,  $n$  and  $n'$  are the number of generations from sire and dam respectively to the ancestor of individual  $x$ .
- $F_{Bal(x)}$  is the ancestral inbreeding coefficient for an individual ( $x$ ) with the subscripts (s) and (d) representing for the sire and dam, respectively.
- $F_{i,old}(t, u)$  is the old inbreeding coefficient of individual  $i$  in generation  $u$  with respect to a base generation at generation  $t$ .
- $F_{i,new}(t, u)$  is the new inbreeding coefficient of individual  $i$  in generation  $u$  with respect to a base generation at generation  $t$ .
- $s$  is the selection coefficient against the homozygote and  $h$  is the dominance coefficient
- $\hat{g}$  is the predicted purged inbreeding coefficient based on the purging coefficient  $d$  and effective population size  $N$

- $\Sigma L_{ROH}$  is the total length of all ROH according to a priori specified threshold of succeeding number of homozygotes SNP obtained from the chip arrays, and  $L_{AUTOSOME}$  is the specified length of the autosomal genome covered by SNP in chip
- $O_{Ei}$  is the probability that an allele, autozygous in  $I$ ,  $F_{i(j)}$  is the probability of an allele in  $I$  being derived from an allele in  $j$  and being autozygous in  $i$ ;
- $S_F$  is the probability of survival of individuals with an inbreeding coefficient of  $F$ ,  $e^{-A}$  is the survival in a non-inbred random mating population ( $F = 0$ ) and  $B$  is haploid lethal equivalentsts;

## References:

1. Wright, S. Coefficients of inbreeding and relationship. *Am. Nat.* **1922**, *56*, 330–338. <https://doi.org/10.1086/279872>.
2. Suwanlee, S.; Baumung, R.; Sölkner, J.; Curik, I. Evaluation of ancestral inbreeding coefficients: ballou's formula versus gene dropping. *Conserv Genet.* **2007**, *8*, 489–495. <https://doi.org/10.1007/s10592-006-9187-9>.
3. Boichard, D. PEDIG: A fortran package for pedigree analysis suited for large populations. In Proceedings of the 7th World Congress on Genetics Applied to Livestock Production, Montpellier, France, 19–23 August **2002**; pp. 525–528.
4. Coster, A.; Coster, M.A. Package 'Pedigree'. R Package Version 1.4. 2010. Available online: <https://cran.r-project.org/web/packages/pedigree/index.html> (accessed on 21 October 2023).
5. Gutiérrez, J.P.; Goyache, F. A note on ENDOG: A computer program for analysing pedigree information. *J. Anim. Breed. Genet.* **2005**, *122*, 172–176. <https://doi.org/10.1111/j.1439-0388.2005.00512.x>
6. Doekes, H.P.; Curik, I.; Nagy, I.; Farkas, J.; Kövér, G.; Windig, J.J. Revised calculation of Kalinowski's ancestral and new inbreeding coefficients. *Diversity* **2020**, *12*, 155. <https://doi.org/10.3390/d12040155>.
7. Ballou, J.D. Ancestral inbreeding only minimally affects inbreeding depression in mammalian populations. *J. Hered.* **1997**, *88*, 169–178. <https://doi.org/10.1093/oxfordjournals.jhered.a023085>
8. Baumung, R.; Farkas, J.; Boichard, D.; Mészáros, G.; Sölkner, J.; Curik, I. GRAIN: A computer program to calculate ancestral and partial inbreeding coefficients using a gene dropping approach. *J. Anim. Breed. Genet.* **2015**, *132*, 100–108. <https://doi.org/10.1111/jbg.12145>.
9. Templeton, A.R.; Read, B. Elimination of inbreeding depression from a captive population of Speke's gazelle: Validity of the original statistical analysis and confirmation by permutation testing. *Zoo Biol.* **1998**, *17*, 77–94.
10. Kennedy, E.S.; Grueber, C.E.; Duncan, R.P.; Jamieson, I.G. Severe inbreeding depression and no evidence of purging in an extremely inbred wild species—The Chatham Island black robin. *Evolution* **2014**, *68*, 987–995. <https://doi.org/10.1111/evo.12315>
11. Hinrichs, D.; Meuwissen, T.H.E.; Ødegard, J.; Holt, M.; Vangen, O.; Woolliams, J.A.; Analysis of inbreeding depression in the first litter size of mice in a long-term selection experiment with respect to the age of the inbreeding. *Heredity* **2007**, *99*, 81–88. <https://doi.org/10.1038/sj.hdy.6800968>.
12. López-Cortegano, E.; Moreno, E.; García-Dorado, A. Genetic purging in captive endangered ungulates with extremely low effective population sizes. *Heredity* **2021**, *127*, 433–442. <https://doi.org/10.1038/s41437-021-00473-2> 4.
13. García-Dorado, A.; Wang, J.; López-Cortegano, E. Predictive model and software for inbreeding-purging analysis of pedigreed populations. *G3: Genes Genomes Genet.* **2016**, *6*, 3593–3601. <https://doi.org/10.1534/g3.116.032425>.

14. López-Cortegano, E. PurgeR: Inbreeding and purging in pedigreed populations. *Bioinformatics* **2022**, 38, 564–565. <https://doi.org/10.1093/bioinformatics/btab599>.
15. Kardos, M.; Luikart, G.; Allendorf, F.W. Measuring individual inbreeding in the age of genomics: Marker based measures are better than pedigrees. *Heredity* **2015**, 115, 63–72. <https://doi.org/10.1038/hdy.2015.17>.
16. Morton, N.E.; Crow, J.F.; Muller, H.J. An estimate of the mutational damage in man from data on consanguineous marriages. *Proc. Natl. Acad. Sci. USA* **1956**, 42, 855–863. <https://doi.org/10.1073/pnas.42.11.855>.
17. Hoeck, P.E.A.; Wolak, M.E.; Switzer, R.A.; Kuehler, C.M.; Lieberman, A.A. Effects of inbreeding and parental incubation on captive breeding success in Hawaiian crows. *Biol. Conserv.* **2015**, 184, 357–364. <https://doi.org/10.1016/j.biocon.2015.02.011>.
